1 **FIRST DETECTION OF SARS-COV-2 IN UNTREATED WASTEWATERS IN ITALY**

2

3 Giuseppina La Rosa<sup>1\*</sup>, Marcello Iaconelli<sup>1</sup>, Pamela Mancini<sup>1</sup>, Giusy Bonanno Ferraro<sup>1</sup>, Carolina

4 Veneri<sup>1</sup>, Lucia Bonadonna<sup>1</sup>, Luca Lucentini<sup>1</sup>, Elisabetta Suffredini<sup>2</sup>

5

6

7 <sup>1</sup> Department of Environment and Health - Istituto Superiore di Sanità, Rome, Italy

8 <sup>2</sup> Department of Food Safety, Nutrition and Veterinary Public Health, Istituto Superiore di Sanità,

9 Rome, Italy

10

11

12

13

14

15 **Keywords:** SARS-CoV-2, Coronavirus, COVID-19, sewage, wastewater, surveillance

---

\* **Corresponding author:** Giuseppina La Rosa has not been certified by peer review and should not be used to guide clinical practice. Istituto Superiore di Sanità, Department of Environment and Health, Viale Regina Elena 299, 00161, Rome, Italy. Phone/Fax: 0039-06-49902718. E-mail: giuseppina.larosa@iss.it

16 **ABSTRACT**

17

18 Several studies have demonstrated the advantages of environmental surveillance through the  
19 monitoring of sewer systems for the assessment of viruses circulating in a given community  
20 (wastewater-based epidemiology, WBE).

21 During the COVID-19 public health emergency, many reports have described the presence of SARS-  
22 CoV-2 RNA in stools from COVID-19 patients, and a few studies reported the occurrence of SARS-  
23 CoV-2 in wastewaters worldwide. Italy is among the world's worst-affected countries in the COVID-  
24 19 pandemic, but so far there are no studies assessing the presence of SARS-CoV-2 in Italian  
25 wastewaters. To this aim, twelve influent sewage samples, collected between February and April  
26 2020 from Wastewater Treatment Plants in Milan and Rome, were tested adapting, for concentration,  
27 the standard WHO procedure for Poliovirus surveillance. Molecular analysis was undertaken with  
28 three nested protocols, including a newly designed SARS-CoV-2 specific primer set.

29 SARS-CoV-2 RNA detection occurred in volumes of 250 mL of wastewaters collected in both areas  
30 at high (Milan) and low (Rome) epidemic circulation, according to clinical data. Overall, 6 out of 12  
31 samples were positive. One of the positive results was obtained in a Milan wastewater sample  
32 collected a few days after the first notified Italian case of autochthonous SARS-CoV-2.

33 The study shows that WBE has the potential to be applied to SARS-CoV-2 as a sensitive tool to study  
34 spatial and temporal trends of virus circulation in the population.

35

## 36 INTRODUCTION

37

38 Severe Acute Respiratory Syndrome Coronavirus 2 (SARS-CoV-2) is responsible for the coronavirus  
39 disease COVID-19, a public health emergency worldwide. On March 11 2020, the World Health  
40 Organization declared COVID-19 a pandemic. Italy is among the world's most affected countries in  
41 the COVID-19 pandemic. Indeed, after entering Italy, COVID-19 has been spreading fast. As of April  
42 20<sup>th</sup> 2020, the total number of cases reported by the authorities reached 181,228, with 108,237 active  
43 cases (Dipartimento della Protezione Civile, Bulletin 20.04.2020), mainly located in Northern Italy  
44 (Lombardy, and its neighbouring regions of Emilia-Romagna and Piedmont).

45 Presymptomatic and paucisymptomatic carriers, mostly undetected in clinical and laboratory  
46 surveillance systems, contribute to the spread of the disease (Bay et al., 2020; Nicastri et al., 2020;  
47 Rothe et al., 2020; WHO, 2020) and hamper the efforts made to assess the extent of SARS-CoV-2  
48 circulation in the population and to control efficiently virus transmission. Analytical regular  
49 investigation of wastewaters provides valuable information to measure viral circulation in the  
50 population as Wastewater Treatment Plants (WWTPs), collecting and concentrating human excreta,  
51 are useful sampling points receiving discharges from the entire community.

52 Environmental microbiologists have studied pathogens in sewage for decades (La Rosa & Muscillo,  
53 2012; Sinclair *et al.*, 2008). The screening of wastewater, as a public health surveillance tool, defined  
54 as wastewater-based epidemiology (WBE), is currently well recognized (Xagorarakis & O'Brien,  
55 2020). In the recent years, scientists have applied WBE to a wide range of waterborne, foodborne and  
56 fecal-oral viruses, which infected individuals usually excrete in high concentration with faeces  
57 (Katayama et al., 2008; Iaconelli et al., 2017; Bisseaux et al., 2018). However, the concept of WBE  
58 can also be applied to viruses beyond those commonly associated with the faecal-oral route (i.e.  
59 enteric viruses), since viral shedding may involve different body fluids ultimately discharged into  
60 urban sewage.

61 Some studies have reported the presence of virus RNA in the stools of COVID-19 patients in  
62 percentages ranging from 16.5% to 100% at a concentration up to 6.8 log<sub>10</sub> genome copies/g of stool  
63 (Chen et al., 200; Lo et al., 2000; Han et al., 2000; Lescure et al., 2000). Furthermore, preliminary  
64 studies have reported the detection of SARS-CoV-2 RNA in wastewater in The Netherlands (Medema  
65 *et al.*, 2020), France (Wurtzer et al., 2020), USA (Wu et al., 2020), and Australia (Ashmed et al.,  
66 2020). To date, no study has yet provided insights into the presence of SARS-CoV-2 in wastewaters  
67 in Italy.

68 Herein we report the results of the screening for SARS-CoV-2 presence in sewage samples collected  
69 between the end of February and the beginning of April 2020 from WWTPs in Milan (Northern Italy)  
70 and Rome (Central Italy).

71

72

73

## 74 **MATERIAL AND METHODS**

75

76 Twelve raw sewage samples were collected between the 3<sup>rd</sup> of February and the 2<sup>nd</sup> of April 2020  
77 from three WWTPs, located in Milan (two distinct plants, reported as A and B) and in Rome (one  
78 plant receiving two different pipelines, C1 and C2, from different districts of the town), respectively.

79 The samples (24-hour composites) were collected from the WWTP influent, immediately stored at -  
80 20 °C, and dispatched frozen to the National Institute of Health for analysis. Before viral  
81 concentration, samples underwent a 30 min treatment at 57 °C to increase the safety of the analytical  
82 protocol for the laboratory personnel and environment, as Pastorino et al. (2020) reported these  
83 conditions to reduce the virulence of the virus by over 5 log.

84 Sample concentration took place using a two-phase (PEG-dextran method) separation as detailed in  
85 the 2003 WHO Guidelines for Environmental Surveillance of Poliovirus protocol (WHO, 2003), with  
86 modifications to adapt the protocol to enveloped viruses. In brief, the wastewater sample (250 mL)

87 was centrifuged to pellet the wastewater solids, retaining the pellet for further processing. The  
88 clarified wastewater was mixed with dextran and polyethylene glycol (PEG), and the mixture was  
89 left to stand overnight at 4 °C in a separation funnel. The bottom layer and the interphase were then  
90 collected drop-wise, and this concentrate was added to the pellet from the initial centrifugation. The  
91 chloroform treatment that the WHO protocol envisages at this stage was omitted; this preserved the  
92 integrity of the enveloped viruses object of this study. The viral nucleic acids extraction foresaw the  
93 use of the NucliSENS miniMAG semi-automated extraction system with magnetic silica carried out  
94 following manufacturer's instructions (bioMerieux, Marcy l'Etoile, France) with however slight  
95 modifications. The lysis phase was prolonged to 20 minutes, and brief centrifugation ( $2000 \times g$ , 1  
96 min) was used to pellet the sediment; subsequently, magnetic silica beads were added to the cleaned  
97 supernatant. Before molecular tests, the extracted nucleic acids were further purified by PCR  
98 inhibitors using the OneStep PCR Inhibitor Removal Kit (Zymo Research, CA, USA).

99 In the absence of a standardized method for SARS-CoV-2 detection in environmental samples, RNAs  
100 were tested for the presence of SARS-CoV-2 using three different PCR assays (Table 1 and Figure  
101 1):

- 102 a) a broad range of PCR for Coronavirus detection targeting the ORF1ab (Ar Guilh et al.,  
103 2018). Primers were previously designed targeting a highly conserved region (nsp12) among  
104 all Coronavirinae sequences to detect a broad range of coronaviruses by a semi-nested PCR  
105 producing a fragment of 218 bp.
- 106 b) a newly designed primer set specific for SARS-CoV-2. Novel nested primers, amplifying a  
107 332 bp fragment of ORF1ab, were designed using prime3 software (<http://primer3.ut.ee/>).  
108 For the assays a) and b) first-strand cDNA was synthesized using Super Script IV Reverse  
109 Transcriptase (ThermoFisher Scientific) with the reverse primer. PCR reaction was  
110 performed using 2.5 µl of cDNA in a final volume of 25 µl (Kit Platinum™ SuperFi™ Green  
111 PCR Master Mix, Thermo), using 1 µl of primers (10 µM). The PCR conditions were as  
112 follows: 98 °C for 30 sec; 35 cycles of 98 °C for 10 sec, 50 °C and 54 °C for 10 sec for assay

113 a) and b) respectively, and 72 °C for 30 sec; final extension 72 °C for 5 min. After the first  
114 round PCR, nested PCR was performed using 2 µl of first PCR product and under the same  
115 reaction composition and thermal profile conditions. A synthetic DNA (Biofab Research)  
116 including the PCR target region, was used to set up PCR conditions before experiments with  
117 study samples, but was not amplified along with samples to avoid risks of PCR contamination  
118 . Molecular grade water was used as the negative control.

119 c) a published nested RT-PCR for SARS-CoV-2 targeting the spike region (Nao et al., 2020).  
120 cDNA was synthesized from 5 µl of sample RNA, using SuperScript III Reverse  
121 Transcriptase (ThermoFisher Scientific), 0.5 µM of the reverse primer (WuhanCoV-spk2-r,  
122 Table 1) and a 50 min reaction at 50 °C (20 µl final volume). First PCR reaction was  
123 performed by adding the reaction mix (Dream Taq polymerase and buffer from ThermoFisher  
124 Scientific, 0.4 µM of primers WuhanCoV-spk2-r and WuhanCoV-spk1-f) directly to the  
125 whole volume of synthesized cDNA. The used PCR conditions were as follows: 95°C for 1  
126 min; 35 cycles of 95 °C for 30 sec, 56 °C for 30 sec, and 72 °C for 40 sec; final extension 72  
127 °C for 5 min. Nested PCR (primers NIID\_WH-1\_F24381 and NIID\_WH-1\_R24873) was  
128 performed in a total volume of 50 µl using 5 µl of first PCR product, with the same conditions  
129 applied for the first PCR and 45 cycles.

130 All positive samples were retested for confirmation of results. The PCR products were revealed by  
131 electrophoresis on 2% agarose gels and were purified using a Montage PCRm96 Microwell Filter  
132 Plate (Millipore, Billerica, MA, USA) and then direct sequenced on both strands (BioFab Research,  
133 Rome, Italy). Sequences were identified in terms of the closest homology sequence using BLAST  
134 <https://blast.ncbi.nlm.nih.gov/Blast.cgi>. All Italian SARS-CoV-2 genome sequences available at the  
135 time of analysis were retrieved from GISAID (<https://www.gisaid.org/>) for comparison with study  
136 sequences, using the MEGA X software (Kumar *et al.*, 2018)..

137 Sequences were submitted to NCBI GenBank with the accession numbers: [GenBank submission ID  
138 2337138 and 2337168].

139

## 140 **RESULTS AND DISCUSSION**

141

142 The 50% (6/12) of the wastewater samples showed positive results for SARS-CoV-2 RNA (Table 2).

143 Both the published and newly designed SARS-CoV-2 specific primer sets detected bands of the

144 expected size and were confirmed by the sequencing. In contrast, only aspecific products were

145 detected with a broad range assay for coronavirus. Upon comparison of broad range primers with

146 SARS-CoV-2 genome, we noted that they showed only 77.1 to 91.3 % nt identity, which explain why

147 these were not able to amplify the novel coronavirus.

148 SARS-CoV-2 RNA was first detected with a weak amplification signal in an influent sample from

149 Milan WWTPs (Lombardy, North Italy) collected on February 24<sup>th</sup> from the plant A with the ORF1ab

150 assay. A positive result for SARS-CoV-2 was also detected this time with a strong amplification

151 signal, on February 28<sup>th</sup> from the plant B, with both the ORF1ab and the Spike regions. In the influent

152 samples taken from the WWTP in Rome (Latium, Central Italy), SARS-CoV-2 was detected in both

153 the sampling dates (31<sup>st</sup> of March and 2<sup>nd</sup> of April) and both the pipelines, C1 and C2, using the newly

154 designed primer sets specific for SARS-CoV-2. The analyzed sequences showed, for both ORF1ab

155 and S partial gene regions, 100% identity with the first SARS-CoV-2 sequence detected in Italy

156 (MT066156), isolated on 30<sup>th</sup> January 2020 from a Chinese tourist by the Institute “Lazzaro

157 Spallanzani” (INMI, Rome). Given the high level of conservation of the two analysed regions, 100%

158 identity was also detected with several sequences in GenBank and with all the other Italian SARS-

159 CoV-2 genomes deposited in Gisaïd.

160 Significantly, on February 24<sup>th</sup> and 28<sup>th</sup>, when the samples positive for SARS-CoV-2 were collected

161 in Milan, COVID-19 infections were still limited in Italy, the first Italian autochthonous SARS-CoV-

162 2 positive case having been reported only a few days earlier, on February 21<sup>st</sup>. On February 28<sup>th</sup>, the

163 total number of SARS-CoV-2 positive patients reported in all Italy was only 888, with 531 (57%) in

164 Lombardy, the most affected region in the country. However, at that time, the vast majority of cases

165 in Lombardy were recorded in the provinces of Lodi, Cremona and Bergamo (182, 123, and 103  
166 cases, respectively). In comparison, in the province of Milan (an even larger area compared to the  
167 metropolitan area served by the selected WWTPs) only 29 cases had been reported (Dipartimento  
168 della Protezione Civile, Bulletin 28.02.2020).

169 These results provide evidence of the sensitivity of environmental surveillance for the detection of  
170 ongoing outbreaks in the population. Virus detection in sewage, despite the low incidence of reported  
171 human infections, may be associated with the ability of environmental surveillance to detect mild,  
172 subclinical, or asymptomatic cases. These infected individuals shed viruses into local sewage systems  
173 and contribute to virus circulation while remaining substantially undetectable by clinical surveillance,  
174 a phenomenon known as the “surveillance pyramid” (Martinez Wassaf et al., 2014). Clinical  
175 surveillance, indeed, only captures the tip of the iceberg of viral diseases (hospitalized patients or  
176 laboratory diagnosed cases). In contrast, monitoring of urban wastewaters makes it possible to capture  
177 the full extent of the diseases at a community level.

178 As regards to the influent samples collected in Rome, SARS-CoV-2 detection was obtained on March  
179 31, when the epidemic had spread considerably in Italy. In that date, a total of 77.635 SARS-CoV-2  
180 infections had been reported in Italy, of which 3.095 in Latium Region and 2.186 in the province of  
181 Rome (Dipartimento della Protezione Civile, Bulletin 31.03.2020), with about 85% of them being  
182 active cases (Assessorato alla Sanità e all’Integrazione Socio Sanitaria della Regione Lazio; Ministero  
183 della Salute, Bulletin 31.03.2020). Given this diffusion of the virus, with such several excreting  
184 patients (symptomatic and asymptomatic), the detection of the viral RNA in the tested samples is not  
185 surprising and, consistently, the samples taken two days later, on the 2<sup>nd</sup> April, at the same WWTP  
186 were still positive for SARS-CoV-2 RNA.

187 Following this investigation on the occurrence of SARS-CoV-2 RNA in sewage, the production of  
188 quantitative data on virus concentration in raw sewage will be undertaken. This approach will allow  
189 obtaining a rough estimation of the total number of subjects excreting the virus, by integrating - as  
190 done by Wu and co-workers in samples taken in the United States (Wu et al., 2020) - the available



191 information on viral shedding rates, WWTPs loads, and virus concentration in wastewaters.  
192 Moreover, the environmental surveillance will be extended to the collection of wastewater samples  
193 available in the Department of Environment and Health of the Italian National Health Institute, that  
194 were collected throughout Italy in the framework of different projects on enteric viruses. Such  
195 monitoring will provide a picture of the SARS-CoV-2 circulation across the different regions of Italy  
196 and over time, to better understand the virus circulation, as provided by wastewater-based  
197 epidemiology (WBE) and compare it to the clinical data. Samples collected before the reporting of  
198 the first known Italian case on February 21 will also be tested, to possibly infer when SARS-CoV-2  
199 first appeared in Italy. In a previous study, indeed, wastewater monitoring provided evidence that a  
200 novel variant of Norovirus GII.17 (termed Kawasaki 2014) had been circulating in the Italian  
201 population before its first appearance and identification in clinical cases, later becoming one of the  
202 prevalent variants in the population (Suffredini et al., 2018).

203 Also and most important, environmental monitoring of SARS-CoV-2 in sewages will continue when  
204 the emergency phase is over, and its circulation in the population will be considered limited. Indeed,  
205 sewage surveillance could also serve for the early detection of a possible re-emergence of COVID-  
206 19 in urban areas. WHO recommends environmental surveillance for poliovirus as an early warning  
207 system. As an example, during 2013, Israel observed the silent reintroduction and transmission of  
208 wild poliovirus type 1, detected through routine environmental surveillance performed on sewage  
209 samples ([https://www.who.int/csr/don/2013\\_09\\_20\\_polio/en/](https://www.who.int/csr/don/2013_09_20_polio/en/)) without the reporting of any clinical  
210 cases. Environmental monitoring, therefore, appears to be an effective measure for proving early  
211 warning against pathogen reintroduction.

212 In conclusions, the main findings of this study are:

- 213 1) first detection of SARS-CoV-2 RNA fragments in sewage in Italy;
- 214 2) demonstration of the suitability of the WHO protocol for sewage treatment to enveloped  
215 viruses after appropriate modifications;
- 216 3) design of a novel nested PCR assay specific for SARS-CoV-2, useful for screening purposes.

217 Further research will clarify the applicability of WBE to SARS-CoV-2 for prompt detection, the  
218 study, and the assessment of viral outbreaks.

219

220

221 **Table 1: Primers and amplification protocols used in the study**

| Target                  | Region | Primer Name       | Nucleotide sequence       | Orientation | Usage      | Amplicon size (bp) | Reference              |
|-------------------------|--------|-------------------|---------------------------|-------------|------------|--------------------|------------------------|
| Broad-range Coronavirus | ORF1ab | Bat-CoV pol 15197 | GGTTGGGAYTAYCCWAARTGTGA   | +           | First PCR  | 440                | Ar Gouilh et al., 2019 |
|                         |        | Bat-CoV pol 15635 | CCATCRTCMTGAHARAATCATCATA | -           |            |                    |                        |
|                         |        | Bat-CoV pol 15419 | GTGCTAAACCACCGCCTG        | +           | Nested PCR | 218                |                        |
|                         |        | Bat-CoV pol 15635 | CCATCRTCMTGAHARAATCATCATA | -           |            |                    |                        |
| SARS-CoV-2              | ORF1ab | 2274 - CO-FW1     | GTGCTAAACCACCGCCTG        | +           | First PCR  | 368                | This study             |
|                         |        | 2275 - CO-REV1    | CAGATCATGGTTGCTTTGTAGGT   | -           |            |                    |                        |
|                         |        | 2276 - CO-FW2     | CGCCTGGAGATCAATTTAAACAC   | +           | Nested PCR | 332                |                        |
|                         |        | 2277 - CO-REV2    | ACCTGTAAAACCCCATTTGTTGA   | -           |            |                    |                        |
| SARS-CoV-2              | S      | WuhanCoV-sp1-f    | TTGGCAAAATTCAAGACTCACTTT  | +           | First PCR  | 547                | Nao et al., 2020       |
|                         |        | WuhanCoV-sp2-r    | TGTGGTTCATAAAAATTCCTTTGTG | -           |            |                    |                        |
|                         |        | NIID_WH-1_F24381  | TCAAGACTCACTTTCTTCCAC     | +           | Nested PCR | 493                |                        |
|                         |        | NIID_WH-1_R24873  | ATTTGAAACAAAGACACCTTCAC   | -           |            |                    |                        |

222

223 **Table 2: Results of SARS-CoV-2 detection in the study period**

| City and WWTP   | Date of sampling |        |        |                |        |        |                |        |
|-----------------|------------------|--------|--------|----------------|--------|--------|----------------|--------|
|                 | 03 Feb           | 19 Feb | 23 Feb | 24 Feb         | 26 Feb | 28 Feb | 31 Mar         | 02 Apr |
| Milan – plant A |                  | ×      |        | ○ <sup>a</sup> | ×      | ×      |                |        |
| Milan – plant B | ×                |        | ×      |                | ×      | ○●     |                |        |
| Rome – plant C1 |                  |        |        |                |        |        | ○ <sup>a</sup> | ○      |
| Rome – plant C2 |                  |        |        |                |        |        | ○              | ○●     |

224 × SARS-CoV-2 not detected; ○ SARS-CoV-2 detected (ORF1ab); ● SARS-CoV-2 detected (spike)

225 <sup>a</sup> weak positive

226

227 **Fig. 1: Position on SARS-CoV-2 genome of the primers used in the study**

228

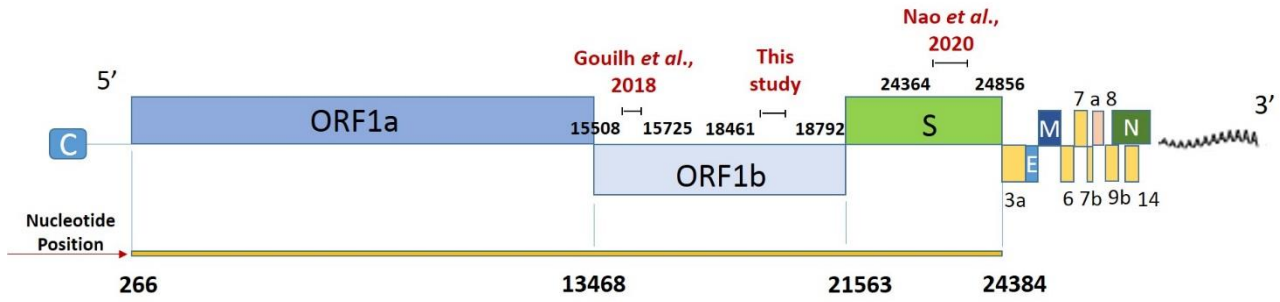

229

230

## Reference List

231

232 **Ahmed, W., Angel, N., Edson, J., et al. (2020).** First confirmed detection of SARS-CoV-2 in  
233 untreated wastewater in Australia: A proof of concept for the wastewater surveillance of  
234 COVID-19 in the community. *Science of the Total Environment*.  
235 <https://doi.org/10.1016/j.scitotenv.2020.138764>

236 **Ar Gouilh, M., Puechmaille, S. J., Diancourt, L., Vandebogaert, M., Serra-Cobo, J., Lopez**  
237 **Roïg, M., et al. (2018).** SARS-CoV related Betacoronavirus and diverse Alphacoronavirus  
238 members found in western old-world. *Virology*, **517**, 88–97.

239 **Assessorato alla Sanità e all’Integrazione Socio Sanitaria della Regione Lazio; Ministero della**  
240 **Salute** – Bulletin 31.03.2020: [http://www.salute.gov.it/imgs/C\\_17\\_notizie\\_4370\\_0\\_file.pdf](http://www.salute.gov.it/imgs/C_17_notizie_4370_0_file.pdf)

241 **Bai, Y., Yao, L., Wei, T., Tian, F., Jin, D.Y., Chen, L., Wang, M. (2020).** Presumed Asymptomatic  
242 Carrier Transmission of COVID-19. *JAMA*, 323(14), 1406–7. doi:10.1001/jama.2020.2565.

243 **Bisseux, M., Colombet, J., Mirand, A., Roque-Afonso, AM., Abravanel, F., Izopet, J.,**  
244 **Archimbaud, C., et al. (2018).** Monitoring human enteric viruses in wastewater and  
245 relevance to infections encountered in the clinical setting: a one-year experiment in central  
246 France, 2014 to 2015. *Euro Surveill.* **23**(7):17-00237. doi: 10.2807/1560-  
247 7917.ES.2018.23.7.17-00237.

248 **Chen, Y., Chen, L., Deng, Q., Zhang, G., Wu, K., Ni, L., et al. (2020).** The Presence of SARS-  
249 CoV-2 RNA in Feces of COVID-19 Patients. *J Med Virol*. Accepted Author Manuscript.

250 **Corman, V. M., Landt, O., Kaiser, M., Molenkamp, R., Meijer, A., Chu, D. K., et al. (2020).**  
251 Detection of 2019 novel coronavirus (2019-nCoV) by real-time RT-PCR. *Euro surveillance:*  
252 bulletin European sur les maladies transmissibles = European communicable disease bulletin,  
253 **25**(3), 2000045.

- 254 **Han, M. S., Seong, M.-W., Heo, E. Y, Park, J. H., Kim, N., Shin, S., et al. (2020).** Sequential  
255 analysis of viral load in a neonate and her mother infected with SARS-CoV-2. *Clinical*  
256 *Infectious Diseases*. ciaa447. <https://doi.org/10.1093/cid/ciaa447>
- 257 **Iaconelli, M., Muscillo, M., Della Libera, S., Fratini, M., Meucci, L., De Ceglia, M., Giacosa, D.,**  
258 **La Rosa, G. (2017).** One-year Surveillance of Human Enteric Viruses in Raw and Treated  
259 Wastewaters, Downstream River Waters, and Drinking Waters. *Food Environ Virol.* **9** (1):79-  
260 88. doi: 10.1007/s12560-016-9263-3.
- 261 **Katayama, H., Haramoto, E., Oguma, K., Yamashita, H., Tajima, A., Nakajima, H., Ohgaki, S.**  
262 **(2008).** One-year monthly quantitative survey of noroviruses, enteroviruses, and adenoviruses  
263 in wastewater collected from six plants in Japan. *Water Res.* 42:1441–1448
- 264 **Kumar, S., Stecher, G., Li, M., Knyaz, C., and Tamura, K. ( 2018).** Molecular Biology and  
265 Evolution 35:1547-1549
- 266 **La Rosa, G., Pourshaban, M., Iaconelli, M., Muscillo, M. (2010).** Quantitative real-time PCR of  
267 enteric viruses in influent and effluent samples from wastewater treatment plants in Italy. *Ann*  
268 *Ist Super Sanità.* 46:266–273
- 269 **La Rosa, G. & Muscillo, M. (2013).**Molecular detection of viruses in water and sewage . In *Viruses*  
270 *in food and water: risks, surveillance and control.* pp. 97-125.
- 271 **Lescure, F. X., Bouadma, L., Nguyen, D., Parisey, M., Wicky, P. H., Behillil, S., et al. (2020).**  
272 Clinical and virological data of the first cases of COVID-19 in Europe: a case series. *Lancet.*  
273 *Infect Dis.* S1473-3099(20)30200-0. Advance online publication.  
274 [https://doi.org/10.1016/S1473-3099\(20\)30200-0](https://doi.org/10.1016/S1473-3099(20)30200-0)
- 275 **Lo, I. L., Lio, C. F., Cheong, H. H., Lei, C. I., Cheong, T. H., Zhong, X., et al. (2020).** Evaluation  
276 of SARS-CoV-2 RNA shedding in clinical specimens and clinical characteristics of 10

277 patients with COVID-19 in Macau. *International journal of biological sciences* **16**(10), 1698–  
278 1707.

279 **Martinez Wassaf, G.M., Pisano, M.B., Barril, P.A., Elbarcha, O.C., Pinto, M.A., Mendes de,**  
280 **O.J., et al.(2014).** First detection of hepatitis E virus in Central Argentina: Environmental and  
281 serological survey. *J. Clin. Virol.* **61**, 334–339.

282 **Medema, G., Heijnen, L., Elsinga, G., Italiaander, R. & Brouwer, A. (2020).** Presence of SARS-  
283 Coronavirus-2 in sewage. *medRxiv preprint*.

284 **Nao, N., Shirato, K., Katano, H., Matsuyama, S. & Takeda M. (2020).** Detection of second case  
285 of 2019-nCoV infection in Japan.

286 **Nicastri, E., D'Abramo, A., Faggioni, G., De Santis, R., Mariano, A., Lepore, L., et al. (2020).**  
287 Coronavirus disease (COVID-19) in a paucisymptomatic patient: epidemiological and clinical  
288 challenge in settings with limited community transmission, Italy, February 2020. *Euro*  
289 *surveillance: bulletin Europeen sur les maladies transmissibles*, 25 (11), 2000230.  
290 <https://doi.org/10.2807/1560-7917.ES.2020.25.11.2000230>

291 **Pastorino, B., Touret, F., Gilles, M., de Lamballerie, X., & Charrel, R.N. (2020).**Evaluation of  
292 heating and chemical protocols for inactivating SARS-CoV-2. *bioRxiv prept.*  
293 <https://doi.org/10.1101/2020.04.11.036855>

294 **Dipartimento della Protezione Civile** – Bulletin 28.02.2020: [https://github.com/pcm-dpc/COVID-](https://github.com/pcm-dpc/COVID-19/blob/master/dati-province/dpc-covid19-ita-province-20200228.csv)  
295 [19/blob/master/dati-province/dpc-covid19-ita-province-20200228.csv](https://github.com/pcm-dpc/COVID-19/blob/master/dati-province/dpc-covid19-ita-province-20200228.csv)

296 **Dipartimento della Protezione Civile** – Bulletin 31.03.2020: [https://github.com/pcm-dpc/COVID-](https://github.com/pcm-dpc/COVID-19/blob/master/dati-province/dpc-covid19-ita-province-20200331.csv)  
297 [19/blob/master/dati-province/dpc-covid19-ita-province-20200331.csv](https://github.com/pcm-dpc/COVID-19/blob/master/dati-province/dpc-covid19-ita-province-20200331.csv)

298 **Dipartimento della Protezione Civile** – Bulletin 20.04.2020:  
299 [http://www.protezionecivile.gov.it/media-comunicazione/comunicati-stampa/dettaglio/-](http://www.protezionecivile.gov.it/media-comunicazione/comunicati-stampa/dettaglio/-/asset_publisher/default/content/coronavirus-la-situazione-dei-contagi-in-ital-2)  
300 [/asset\\_publisher/default/content/coronavirus-la-situazione-dei-contagi-in-ital-2](http://www.protezionecivile.gov.it/media-comunicazione/comunicati-stampa/dettaglio/-/asset_publisher/default/content/coronavirus-la-situazione-dei-contagi-in-ital-2)



- 301 **Rothe, C., Schunk, M., Sothmann, P., Bretzel, G., Froeschl, G., Wallrauch, C., et al. (2020).**  
302 Transmission of 2019-nCoV infection from an asymptomatic contact in Germany. *N Engl J*  
303 *Med.* **382** (10): 970-1. [10.1056/NEJMc2001468](https://doi.org/10.1056/NEJMc2001468)
- 304 **Sinclair, R. G., Choi, C. Y., Riley, M. R. & Gerba, C. P. (2008).** Pathogen surveillance through  
305 monitoring of sewer systems. *Adv Appl Microbiol* **65**, 249-269.
- 306 **Suffredini, E., Iaconelli, M., Equestre, M., et al. (2018).** Genetic Diversity Among Genogroup II  
307 Noroviruses and Progressive Emergence of GII.17 in Wastewaters in Italy (2011-2016)  
308 Revealed by Next-Generation and Sanger Sequencing [published correction appears in Food  
309 Environ Virol. 2018 May 4;:]. *Food Environ Virol.* **10**(2), 141–150.
- 310 **World Health Organization. (2003).** Guidelines for Environmental Surveillance of Poliovirus  
311 Circulation. Available online: <https://apps.who.int/iris/handle/10665/67854> (accessed on 27  
312 February 2020).
- 313 **World Health Organization. (2020).** Advice on the use of masks in the context of COVID-19:  
314 interim guidance, 6 April 2020. World Health Organization.  
315 <https://apps.who.int/iris/handle/10665/331693>.
- 316 **Wu, F., Xiao A., Zhang, J., Gu X., Lee, W.L., Kauffman, K., et al. (2020).** SARS-CoV-2 titers in  
317 wastewater are higher than expected from clinically confirmed cases. *medRxiv prep.*  
318 <https://doi.org/10.1101/2020.04.05.20051540>
- 319 **Wurtzer, S., Marechal, V., Mouchel, JM. Moulin, L. (2020).** Time course quantitative detection  
320 of SARS-CoV-2 in Parisian wastewaters correlates with COVID-19 confirmed cases.  
321 *medRxiv prep.* doi: <https://doi.org/10.1101/2020.04.12.20062679>
- 322 **Xagorarakis, I. & O'Brien, E. (2020).** Wastewater-Based Epidemiology for Early Detection of Viral  
323 Outbreaks. In *Women in Water Quality*, pp. 75-97. Edited by C. O'Bannon D.(eds) Women in  
324 Water Quality. Women in Engineering and Science. Springer.

325

326
